# Supplementary material for: Parcellating connectivity in spatial maps
Source: PubMed Central journal article supplement (PMC4338796; doi:10.7717/peerj.784), 2015-02-19

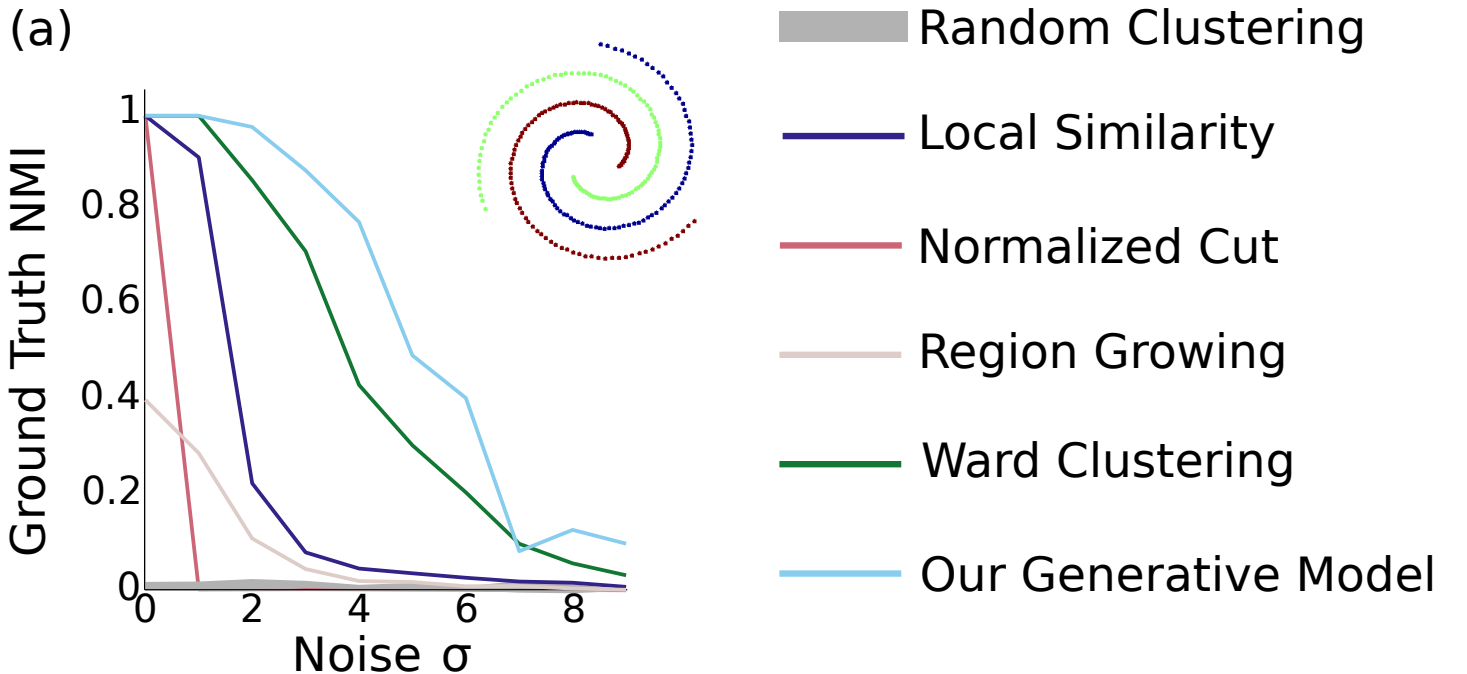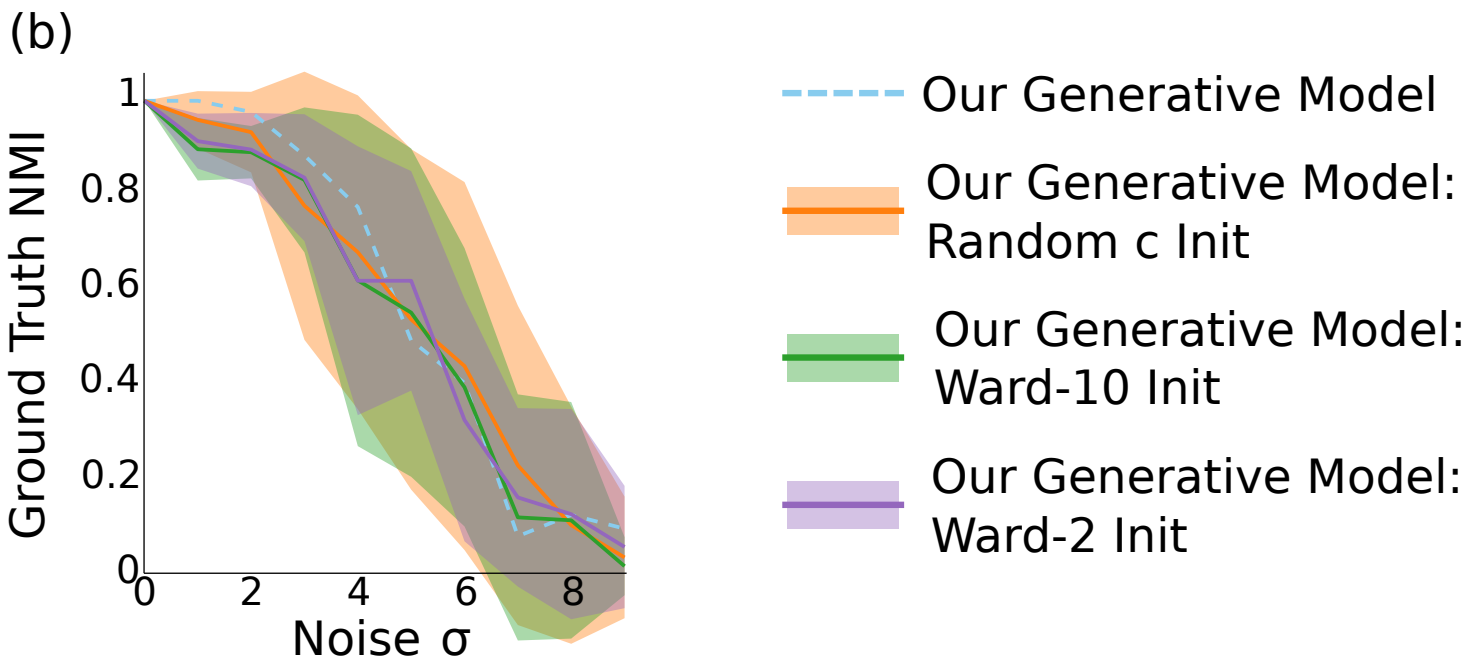

Supplement: peerj-03-784-s001.pdf [file peerj-03-784-s001.pdf]
